# Supplementary material
Source: Copernicus journal article supplement (doi:10.5194/egusphere-2026-2017)
Supplement: Supplementary file 1 [file egusphere-2026-2017-supplement.pdf]

*Supplement of*

**Enhanced Discrimination of Vertical Aerosol Types Based on Multi-Wavelength Mie–Raman–Fluorescence Lidar at a High-Altitude Background Site**

5 **Yutong Tian et al.**

*Correspondence to:* Ting Yang ([tingyang@mail.iap.ac.cn](mailto:tingyang@mail.iap.ac.cn))

The copyright of individual parts of the supplement might differ from the article licence.

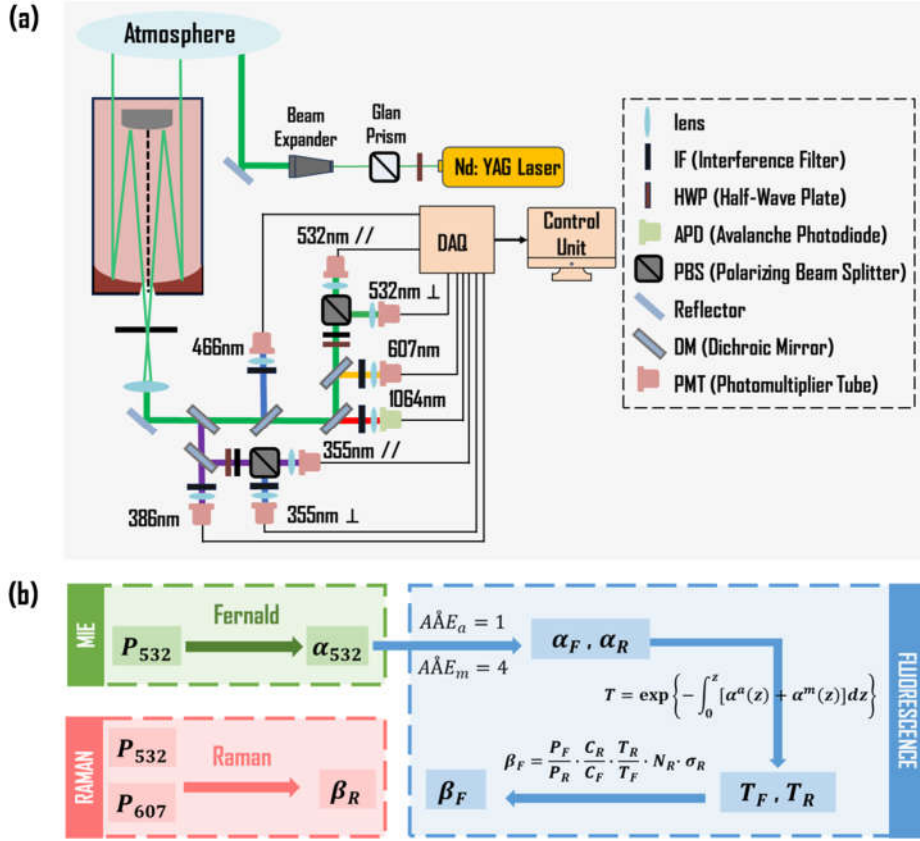

Figure S1: Overview of the multiwavelength Mie–Raman–fluorescence lidar system. (a) Schematic diagram of the instrument configuration. b, Flowchart of the data processing workflow for the retrieval of aerosol optical parameters.

15 Table S1. Reference ranges of seven macroscopic optical parameters for Smoke, Urban, Pollen, and Dust aerosol types.

| Type   | $G_F$ ( $10^{-4}$ )    | $PDR_{355}$                 | $PDR_{532}$                  | $B\hat{A}E_{532/1064}$  | $B\hat{A}E_{355/532}$   | $LR_{355}$            | $LR_{532}$               |
|--------|------------------------|-----------------------------|------------------------------|-------------------------|-------------------------|-----------------------|--------------------------|
| Smoke  | 2.5–4.5 <sup>a</sup>   | 0.01–0.05 <sup>b, c</sup>   | 0.025–0.07 <sup>d, e</sup>   | 1.1–1.5 <sup>e, f</sup> | 0.6–1.9 <sup>e, f</sup> | 40–76 <sup>b-e</sup>  | 30–85 <sup>b-e</sup>     |
| Urban  | 0.2–0.8 <sup>a</sup>   | 0.008–0.014 <sup>c, g</sup> | 0.02–0.12 <sup>c</sup>       | 0.4–1.4 <sup>c</sup>    | 0.4–2.0 <sup>e, h</sup> | 45–60 <sup>c, g</sup> | 28–55 <sup>c, g</sup>    |
| Pollen | 1–2.5 <sup>a</sup>     | 0.08–0.30 <sup>i, j</sup>   | 0.16–0.44 <sup>i, j, k</sup> | 0.5–0.8 <sup>i</sup>    | –0.5–0.5                | 38–63 <sup>k</sup>    | 40–72 <sup>k</sup>       |
| Dust   | 0.05–0.45 <sup>a</sup> | 0.22–0.30 <sup>c, l</sup>   | 0.25–0.35 <sup>c, l</sup>    | 0.3–0.6                 | –0.3–0.44 <sup>c</sup>  | 40–46 <sup>c, l</sup> | 35–44 <sup>c, h, l</sup> |

<sup>a</sup> (Veselovskii et al., 2024). <sup>b</sup>(Haarig et al., 2018). <sup>c</sup>(Floutsi et al., 2023). <sup>d</sup>(De Rosa et al., 2022). <sup>e</sup>(De Rosa et al., 2025). <sup>f</sup>(Mylonaki et al., 2021). <sup>g</sup>(Giannakaki et al., 2016). <sup>h</sup>(Che et al., 2015). <sup>i</sup>(Shang et al., 2020). <sup>j</sup>(Bohlmann et al., 2021). <sup>k</sup>(Bohlmann et al., 2019). <sup>l</sup>(Hofer et al., 2020).

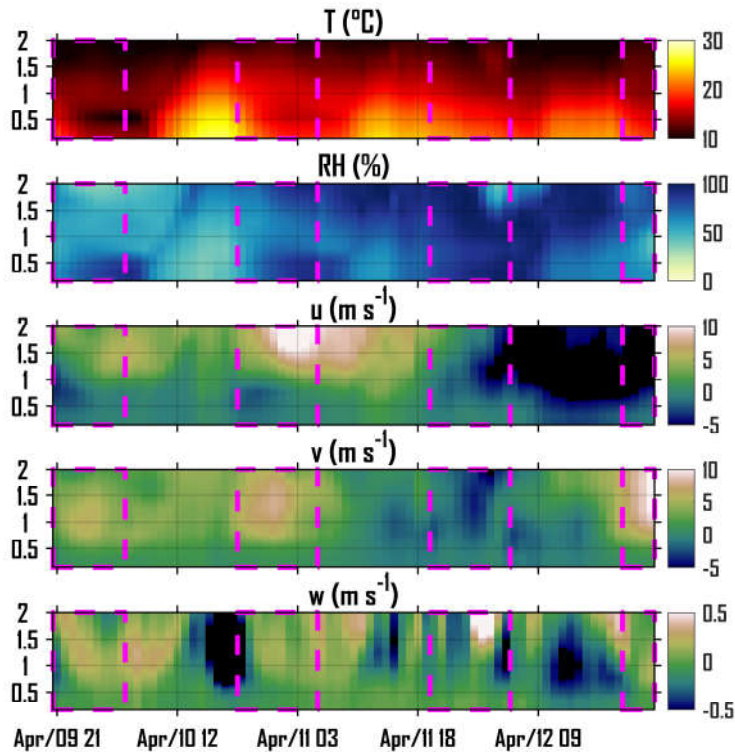

20 Figure S2: Meteorological variables from April 9 to 12, 2023. The dashed box denotes the period coinciding with the retrieval dates.

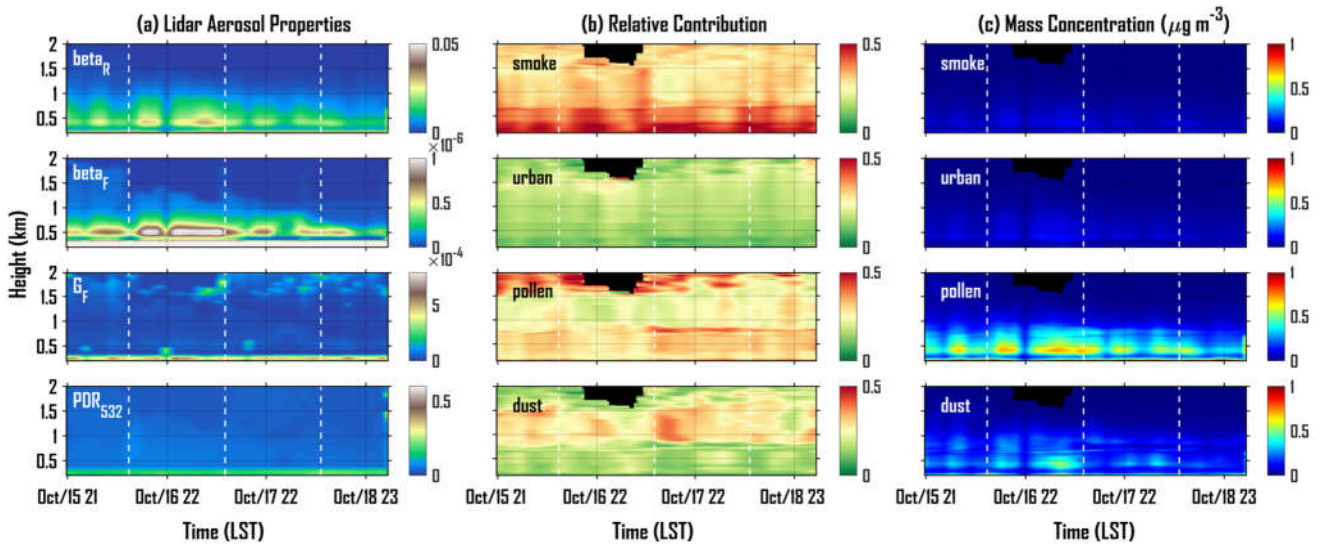

25 Figure S3: Vertical profiles from October 15 to 18, 2023: (a) 532 nm backscatter coefficient ( $\beta_R$ ,  $\text{km}^{-1} \text{sr}^{-1}$ ), fluorescence backscatter coefficient ( $\beta_F$ ,  $\text{km}^{-1} \text{sr}^{-1}$ ), fluorescence capacity, and 532 nm depolarization ratio ( $PDR_{532}$ ); (b) relative contributions of smoke, urban, pollen, and dust to ( $\beta_R$ ); and (c) mass concentrations of the four aerosol types. White dashed lines indicate discontinuous intervals, as the data cover nighttime periods only.

## References

- Bohmann, S., Shang, X., Giannakaki, E., Filioglou, M., Saarto, A., Romakkaniemi, S., and Komppula, M.: Detection and characterization of birch pollen in the atmosphere using a multiwavelength Raman polarization lidar and Hirst-type pollen sampler in Finland, *Atmos. Chem. Phys.*, 19, 14559-14569, 10.5194/acp-19-14559-2019, 2019.
- Bohmann, S., Shang, X., Vakkari, V., Giannakaki, E., Leskinen, A., Lehtinen, K. E. J., Pätsi, S., and Komppula, M.: Lidar depolarization ratio of atmospheric pollen at multiple wavelengths, *Atmos. Chem. Phys.*, 21, 7083-7097, 10.5194/acp-21-7083-2021, 2021.
- Che, H., Xia, X., Zhu, J., Wang, H., Wang, Y., Sun, J., Zhang, X., and Shi, G.: Aerosol optical properties under the condition of heavy haze over an urban site of Beijing, China, *Environmental Science and Pollution Research*, 22, 1043-1053, 10.1007/s11356-014-3415-5, 2015.
- De Rosa, B., Amato, F., Amodeo, A., D'Amico, G., Dema, C., Falconieri, A., Giunta, A., Gumà-Claramunt, P., Kampouri, A., Solomos, S., Mytilinaios, M., Papagiannopoulos, N., Summa, D., Veselovskii, I., and Mona, L.: Characterization of Extremely Fresh Biomass Burning Aerosol by Means of Lidar Observations, 10.3390/rs14194984, 2022.
- De Rosa, B., Amodeo, A., D'Amico, G., Papagiannopoulos, N., Rosoldi, M., Veselovskii, I., Cardellicchio, F., Falconieri, A., Gumà-Claramunt, P., Laurita, T., Mytilinaios, M., Papanikolaou, C.-A., Amodio, D., Colangelo, C., Di Girolamo, P., Gandolfi, I., Giunta, A., Lapenna, E., Marra, F., Petracca Altieri, R. M., Ripepi, E., Summa, D., Volini, M., Arienzo, A., and Mona, L.: Characterization of Fresh and Aged Smoke Particles Simultaneously Observed with an ACTRIS Multi-Wavelength Raman Lidar in Potenza, Italy, 10.3390/rs17152538, 2025.
- Floutsi, A. A., Baars, H., Engelmann, R., Althausen, D., Ansmann, A., Bohmann, S., Heese, B., Hofer, J., Kanitz, T., Haarig, M., Ohneiser, K., Radenz, M., Seifert, P., Skupin, A., Yin, Z., Abdullaev, S. F., Komppula, M., Filioglou, M., Giannakaki, E., Stachlewska, I. S., Janicka, L., Bortoli, D., Marinou, E., Amiridis, V., Gialitaki, A., Mamouri, R. E., Barja, B., and Wandinger, U.: DeLiAn – a growing collection of depolarization ratio, lidar ratio and Ångström exponent for different aerosol types and mixtures from ground-based lidar observations, *Atmos. Meas. Tech.*, 16, 2353-2379, 10.5194/amt-16-2353-2023, 2023.
- Giannakaki, E., van Zyl, P. G., Müller, D., Balis, D., and Komppula, M.: Optical and microphysical characterization of aerosol layers over South Africa by means of multi-wavelength depolarization and Raman lidar measurements, *Atmos. Chem. Phys.*, 16, 8109-8123, 10.5194/acp-16-8109-2016, 2016.
- Haarig, M., Ansmann, A., Baars, H., Jimenez, C., Veselovskii, I., Engelmann, R., and Althausen, D.: Depolarization and lidar ratios at 355, 532, and 1064 nm and microphysical properties of aged tropospheric and stratospheric Canadian wildfire smoke, *Atmos. Chem. Phys.*, 18, 11847-11861, 10.5194/acp-18-11847-2018, 2018.
- Hofer, J., Ansmann, A., Althausen, D., Engelmann, R., Baars, H., Fomba, K. W., Wandinger, U., Abdullaev, S. F., and Makhmudov, A. N.: Optical properties of Central Asian aerosol relevant for spaceborne lidar applications and aerosol typing at 355 and 532 nm, *Atmos. Chem. Phys.*, 20, 9265-9280, 10.5194/acp-20-9265-2020, 2020.
- Mylonaki, M., Giannakaki, E., Papayannis, A., Papanikolaou, C. A., Komppula, M., Nicolae, D., Papagiannopoulos, N., Amodeo, A., Baars, H., and Soupiona, O.: Aerosol type classification analysis using EARLINET multiwavelength and depolarization lidar observations, *Atmos. Chem. Phys.*, 21, 2211-2227, 10.5194/acp-21-2211-2021, 2021.
- Shang, X., Giannakaki, E., Bohmann, S., Filioglou, M., Saarto, A., Ruuskanen, A., Leskinen, A., Romakkaniemi, S., and Komppula, M.: Optical characterization of pure pollen types using a multi-wavelength Raman polarization lidar, *Atmos. Chem. Phys.*, 20, 15323-15339, 10.5194/acp-20-15323-2020, 2020.
- Veselovskii, I., Barchunov, B., Hu, Q., Goloub, P., Podvin, T., Korenskii, M., Dubois, G., Boissiere, W., and Kasianik, N.: Retrieval and analysis of the composition of an aerosol mixture through Mie–Raman–fluorescence lidar observations, *Atmos. Meas. Tech.*, 17, 4137-4152, 10.5194/amt-17-4137-2024, 2024.
